# Supplementary material for: Simplified warming protocol for vitrified human embryos: a comprehensive analysis across various developmental stages and morphological qualities
Source: Research Square preprint supplement (doi:10.21203/rs.3.rs-7611070/v1), 2025-10-06
Supplement: Supplementary file 1 [file dc4960f8c8ed5aefda1a79e9.docx]

Supplemental Table 1. Blastocyst survival and clinical outcome classified by patient age at the time of embryo vitrified

| Variables | | Three-step | Two-step | One-step | *p* value |
| --- | --- | --- | --- | --- | --- |
| Embryos obtained from <40 year-old patients | |  |  |  |  |
|  | No. of warmed blastocysts | 493 | 335 | 203 | - |
|  | Survival rate, n(%) | 493 (100) | 334 (99.70) | 202 (99.51) | 0.3531 |
|  | No. of transferred blastocysts | 493 | 334 | 202 | - |
|  | Gestational sac, n(%) | 295 (59.84) | 201 (60.18) | 114 (56.44) | 0.6529 |
|  | Fetal heartbeat, n(%) | 271 (54.97) | 179 (53.59) | 104 (51.49) | 0.7005 |
|  | Pregnancy loss, n(%) | 52 (17.63) | 40 (19.90) | 22 (19.30) | 0.8022 |
| Embryos obtained from ≥40 year-old patients | |  |  |  |  |
|  | No. of warmed blastocysts | 168 | 94 | 58 | - |
|  | Survival rate, n(%) | 168 (100) | 92 (97.87) | 58 (100) | 0.0890 |
|  | No. of transferred blastocysts | 168 | 92 | 58 | - |
|  | Gestational sac, n(%) | 56 (33.33) | 25 (27.17) | 15 (25.86) | 0.4274 |
|  | Fetal heartbeat, n(%) | 44 (26.19) | 18 (19.57) | 10 (17.24) | 0.2630 |
|  | Pregnancy loss, n(%) | 23 (41.07) | 11 (44.00) | 11 (73.33) | 0.0798 |

Gestational sac and fetal heartbeat were confirmed by transvaginal ultrasound at 4 and 8 weeks after embryo transfer. Pregnancy loss was defined as the failure of a continuing pregnancy after a gestational sac had been confirmed.
